# Supplementary material for: A Low Serum CCL4/MIP-1β Level May Predict a Severe Asthmatic Responsiveness to Mepolizumab
Source: PubMed Central journal article supplement — Intern Med. 2020 Jul 21;59(22):2849–55. doi: 10.2169/internalmedicine.5159-20 (PMC7725639; doi:10.2169/internalmedicine.5159-20), 2020-07-21
Supplement: 1349-7235-59-2849-s001.pdf [file 1349-7235-59-2849-s001.pdf]

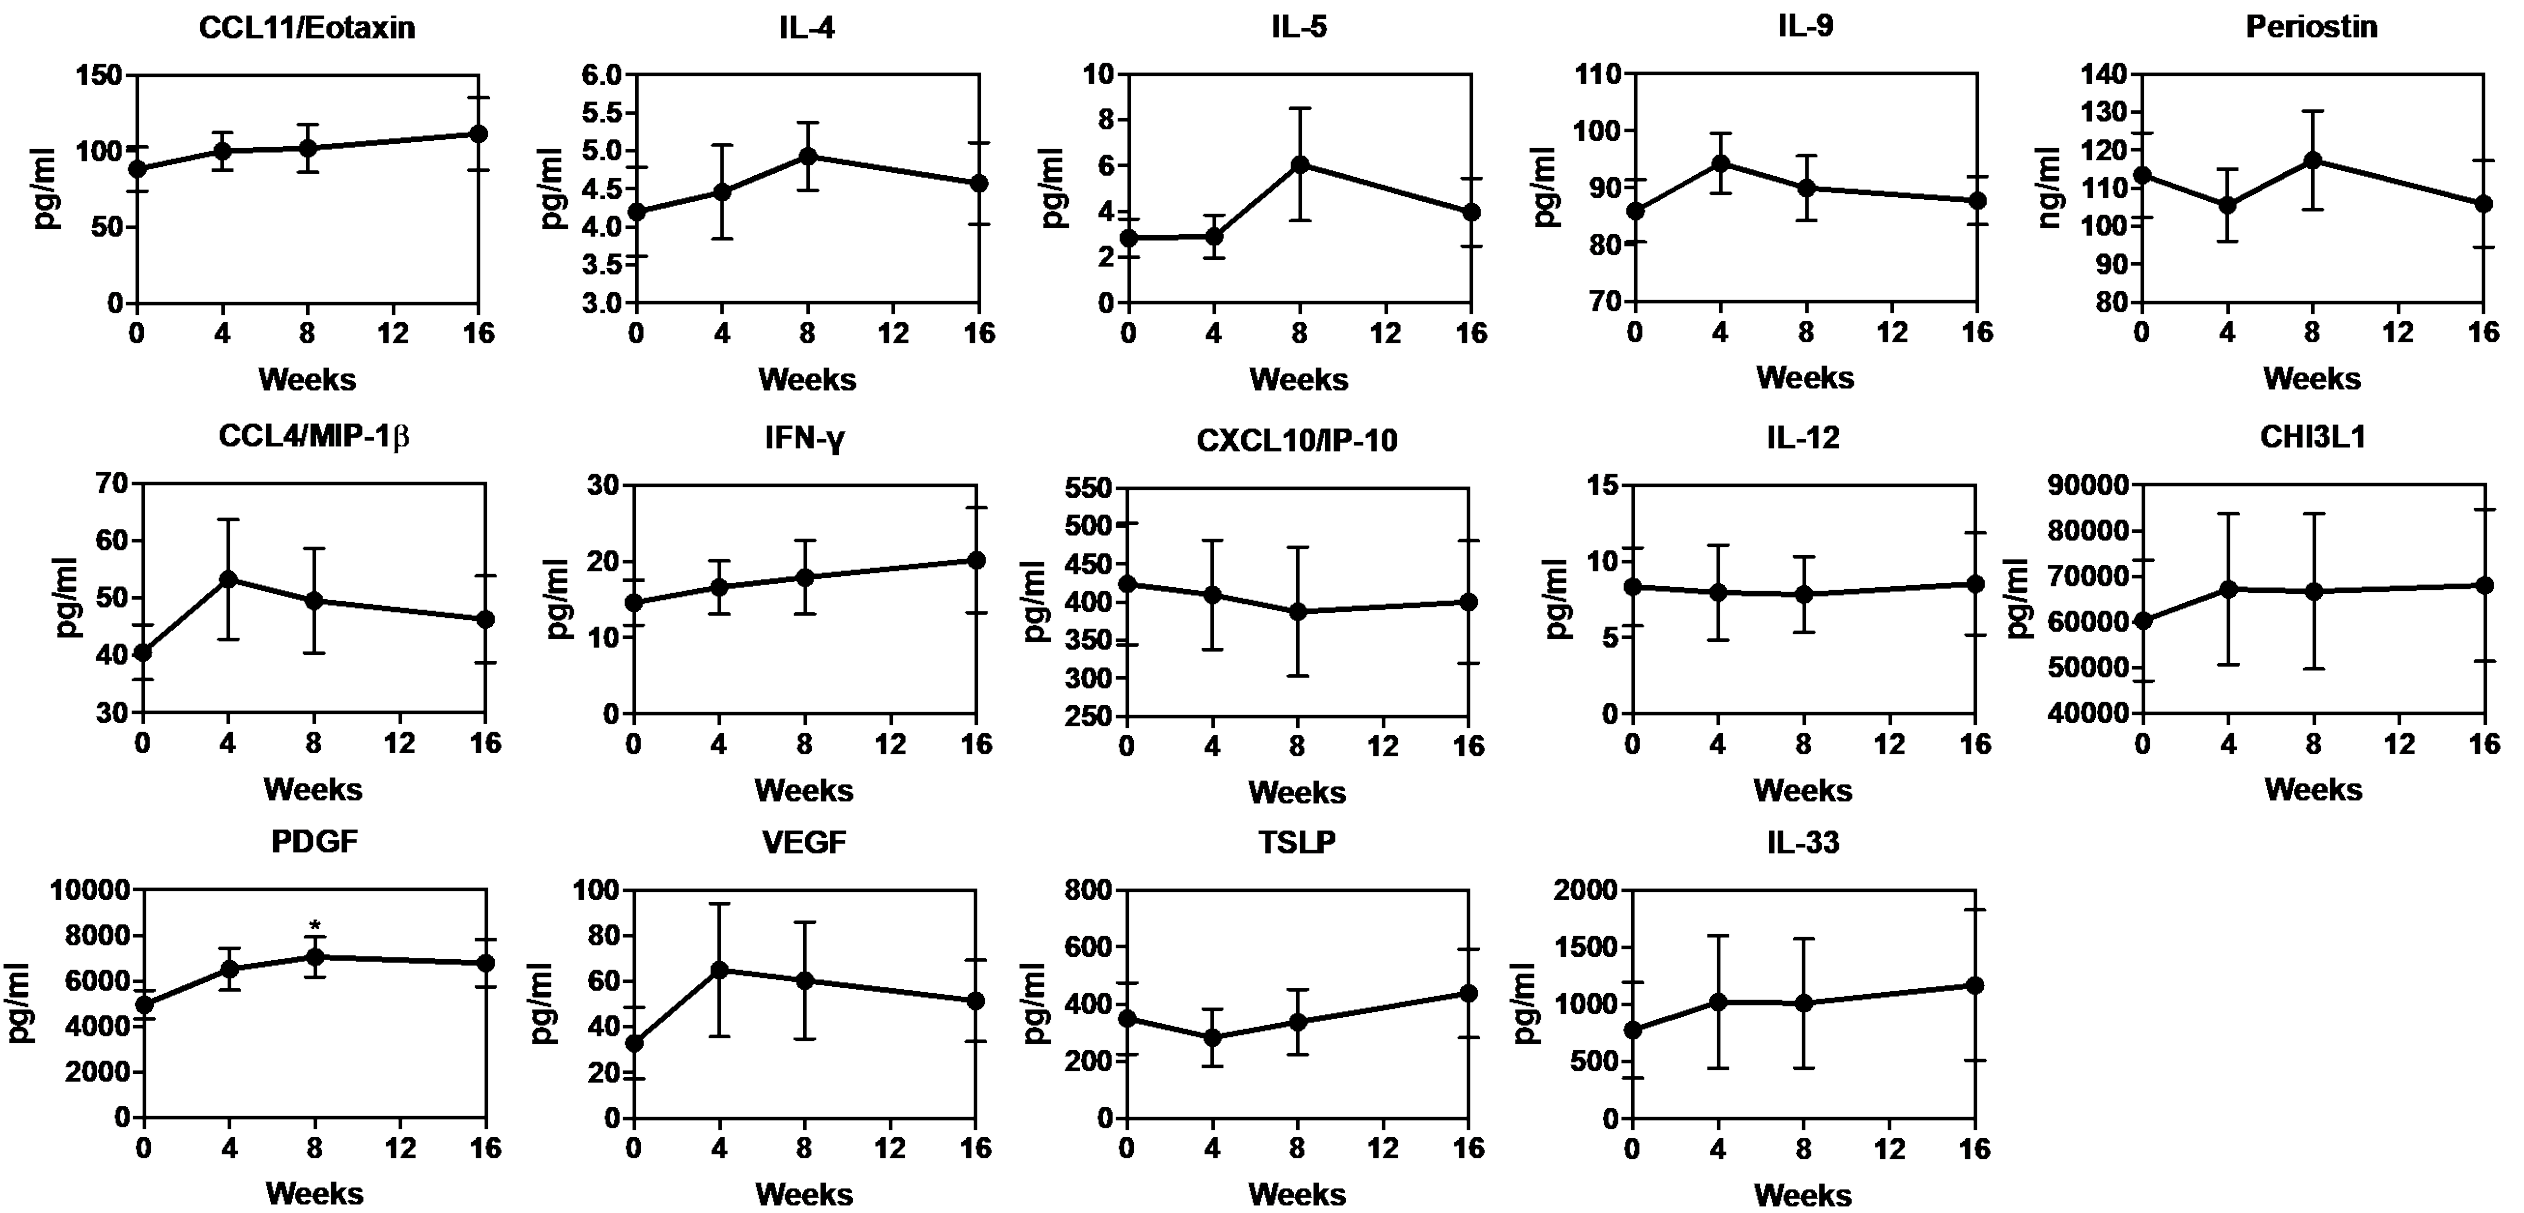

**Supplemental Figure.** Change in serum cytokine levels in patients who underwent mepolizumab therapy.

Serum cytokine levels at baseline and after 1, 4, 8 and 16 weeks in all patients are shown. Bars represent the mean  $\pm$  SEM. \*, P < 0.05 vs the baseline level.
